# Supplementary material
Source: publisher site journal article supplement (https://www.spandidos-publications.com/7221/downloadSupplementary)
Supplement: Supplementary file 1 [file downloadSupplementary]

## Sheet: Table 1
Table SI. Lists of genes involved in the regulation of different types of programmed cell death.
No.	Apoptosis	Pyroptosis	Ferroptosis	Autophagy	Necroptosis	Cuproptosis	Parthanatos	Entotic cell death	Netotic cell death	Lysosome-dependent cell death	Alkaliptosis	Oxeiptosis	PANoptosis	Anoikis	Disulfidptosis
1	AATF	BAK1	RPL8	ABL1	GLUD1	FDX1	PARP	AMPK	ELANE	ABCA2	IKBKB	PGAM5	TAB3	BRMS1	SLC7A11
2	ABL1	BAX	IREB2	ABL2	GLUD2	LIAS	MIF	ATG5	MMP1	ABCB9	NFKB1	KEAP1	ZBP1	NECUT1	SLC3A2
3	ACAA2	CASP1	ATP5MC3	ACER2	ALOX15	LIPT1	AIFM1	ATG7	MPO	ACP2	CA9	AIFM1	PSTPIP2	TAGLN	RPN1
4	ACKR3	CASP3	CS	ADRA1A	FTH1	DLD	HSP70	BECN1	CAMP	ACP5	CHUK	NRF2	MLKL	DYNLL2	NCKAP1
5	ACVR1	CASP4	EMC2	ADRB2	PYG	DLAT	PAAN	CDC42	PADI4	ADGRE2	IKBKG	AIRE	TRADD	ITPRIP	NUBPL
6	ACVR1B	CASP5	ACSF2	AKT1	CAPN1	PDHA1	ARH3	CDH1	EIPA	AGA	NFKB1A		RIPK3	PRDX4	NDUFA11
7	ADORA1	CASP6	G6PD	AMBRA1	CASP1	PDHB	RNF146	CTNNA1	NCX1	AP1B1	RELA		CASP1	PRPF4B	LRPPRC
8	AEN	CASP8	PGD	ATF6	GLNA	SLC31A1	ADPRHL2	CYBB	MIA	AP1G1			FADD	TLN1	OXSM
9	AGT	CASP9	VDAC2	ATG101	BAX	MTF1	OGG1	MYH14		AP1M1			CASP7	MIR145	NDUFS1
10	AGTR2	CHMP2A	TP53	ATG13	BCL2	GLS		PI3KC3		AP1M2			GSDMD	CD44	GYS1
11	AIFM1	CHMP2B	CARS1	ATG14	FADD	CDKN2A		RHOA		AP1S1			TAB2	CYCS
12	AKT1	CHMP3	KEAP1	ATG2A	RIPK1	DNA2		RNF146		AP1S2			TNFAIP3	ABHD2
13	ANXA6	CHMP4A	HMOX1	ATG2B	TNF	NTHL1		ROCK		AP1S3			RIPK1	ABHD4
14	APAF1	CHMP4B	ATG5	ATG5	TNFRSF1A	POLE		RUBCN		AP3B1			IRF1	ABL1
15	APPL1	CHMP4C	ATG7	ATG7	TRADD	POLD1		UVRAG		AP3B2			CASP6	ACP1
16	AR	CHMP6	NCOA4	ATM	TRAF2	CISD1				AP3D1			CASP8	ACTG1
17	ARHGEF2	CHMP7	TF	ATP13A2	PPIA	GLRX5				AP3M1			NLRP3	ADAMTSL1
18	ARL6IP5	CYCS	ALOX5	ATP6V0A1	CAPN2	PPAT				AP3M2			PABP1	ADCY10
19	ARMC10	ELANE	ALOX12	ATP6V0A2	HSP90A	RTEL1				AP3S1			AIM2	AFAP1L1
20	ARRB2	GPX4	ALOX12B	ATP6V0B	IL1A	ELP3				AP3S2			NLRC4	AFP
21	ASAH2	GSDMB	ALOX15	ATP6V0C	TNFSF6	CDK5RAP1				AP4B1			FUNDC1	AKT1
22	ATF3	GSDMC	ALOX15B	ATP6V0D1	TNFRSF6	ISCA2				AP4E1			TAK1	AKT2
23	ATF4	GSDMD	ALOXE3	ATP6V0D2	CASP8	ETFDH				AP4M1			TLR9	AKT3
24	ATM	GSDME	PHKG2	ATP6V0E1	JNK	HSPA1A				AP4S1			ADAR	ANGPTL2
25	ATP2A1	GZMB	ACSL4	ATP6V0E2	JAK2	HSPA1B				ARF1			CASP4	ANGPTL4
26	ATP2A3	HMGB1	SAT1	ATP6V1A	CAMK2	ATP7A				ARL8B			CASP5	ANKRD13C
27	ATP5IF1	IL18	EGFR	ATP6V1B1	IL1B	ATP7B				ARSA			PYCARD	ANXA2
28	AVP	IL1A	NOX4	ATP6V1B2	IFNG					ARSB			TNFRSF1A	ANXA5
29	BAD	IL1B	MAPK3	ATP6V1C1	STAT3					ARSG			CASP10	APOBEC3G
30	BAG3	IRF1	MAPK1	ATP6V1C2	IRF9					ASAH1			DFNA5	AR
31	BAG5	IRF2	ZEB1	ATP6V1D	TNFSF10					ATP10B			TNF	ARHGDIA
32	BAG6	NLRC4	DPP4	ATP6V1E1	TNFRSF10A					ATP13A2			MEFV	ARHGDIB
33	BAK1	NLRP1	CDKN2A	ATP6V1E2	TNFRSF10B					ATP6AP1			NLRP1	ARHGEF7
34	BAX	NLRP2	PEBP1	ATP6V1G1	CFLAR					ATP6V0A1			NLRP9	ATF2
35	BBC3	NLRP3	SOCS1	ATP6V1G2	XIAP					ATP6V0A2			CASP12	ATF4
36	BCAP31	NLRP6	CDO1	ATP6V1H	BID					ATP6V0A4			CDK1	BAD
37	BCL10	NLRP7	MYB	AUP1	AIFM1					ATP6V0B			NFS1	BAG1
38	BCL2	NOD1	SLC1A5	BAD	TRPM7					ATP6V0C			IFNG	BAG4
39	BCL2A1	PLCG1	CHAC1	BAG3	IFNAR1					ATP6V0D1				BAK1
40	BCL2L1	PJVK	GOT1	BCL2	IFNAR2					ATP6V0D2				BAX
41	BCL2L10	PRKACA	BECN1	BCL2L11	IFNGR1					ATP6V1H				BCAR1
42	BCL2L11	PYCARD	PRKAA2	BECN1	IFNGR2					BLK				BCL2
43	BCL2L12	SCAF11	PRKAA1	BMF	TLR3					BLOC1S1				BCL2L1
44	BCL2L14	TINAP	ELAVL1	BNIP3	TIRP					BLOC1S2				BCL2L11
45	BCL2L2	TNF	BAP1	BNIP3L	IFNA					BORCS5				BCL2L15
46	BCL3	TP53	ABCC1	BOK	IFNB					BORCS6				BCL2L2
47	BCLAF1	TP63	ACVR1B	C9orf72	TRIF					BTK				BDNF
48	BDKRB2	AIM2	TGFBR1	CALCOCO2	VDAC1					C12orf4				BID
49	BDNF	GSDMA	IFNG	CAMKK2	SLC25A4S					CBL				BIN1
50	BECN1	IL6	ANO6	CAPN1	PPID					CD164				BIRC3
51	BID	NOD2	HMGB1	CAPNS1	CYLD					CD300A				BIRC5
52	BIK	TIRAP	TNFAIP3	CASP1	RIPK3					CD63				BMF
53	BIRC6		ATF3	CASP3	MLKL					CD68				BMP6
54	BLOC1S2		ATM	CDC37	TRAF5					CD84				BNIP3
55	BMF		YY1AP1	CDK5	TLR4					CHGA				BNIP3L
56	BMP4		EGLN2	CDK5R1	RBCK1					CLN3				BRAF
57	BMP5		MIOX	CHMP4A	HMGB1					CLN5				BRCA2
58	BMPR1B		TAFAZZIN	CHMP4B	JAK1					CLNK				BSG
59	BNIP3		MTDH	CISD2	JAK3					CLTA				BST2
60	BNIP3L		IDH1	CLEC16A	TYK2					CLTB				BUB1
61	BOK		PANX1	CLN3	STAT1					CLTC				BUB3
62	BRCA1		LONP1	CLU	STAT2					CLTCL1				CALR
63	BRCA2		CD82	CPTP	STAT4					CLU				CASP10
64	BRSK2		IL1B	CSNK2A2	STAT5A					CPLX2				CASP2
65	BTK		POR	CTSA	STAT5B					CTNS				CASP3
66	CAAP1		CYB5R1	CTTN	STAT6					CTSA				CASP6
67	CASP1		ELOVL5	DAP	H2A					CTSB				CASP8
68	CASP10		FADS1	DAPK1	TNFAIP3					CTSC				CASP9
69	CASP12		FBXW7	DAPK2	RNF31					CTSD				CAV1
70	CASP2		IL6	DAPK3	CHMP2A					CTSE				CBL
71	CASP3		ATF4	DAPL1	CHMP2B					CTSF				CCAR2
72	CASP4		PEX10	DCN	VPS24					CTSG				CCDC178
73	CASP5		PEX12	DDIT3	CHMP4A					CTSH				CCDC80
74	CASP8		AGPS	DDRGK1	CHMP4B					CTSK				CCN1
75	CASP8AP2		PEX2	DEPDC5	CHMP6					CTSL				CCN2
76	CASP9		FAR1	DEPP1	VPS4					CTSO				CCN6
77	CAV1		PEX3	DHRSX	CHMP1					CTSS				CCND1
78	CCAR2		SIRT1	DNM1L	CHMP5					CTSV				CCR7
79	CCK		GSK3B	DRAM1	SMPD1					CTSW				CD151
80	CD14		MAPK8	DRAM2	PYCARD					CTSZ				CD24
81	CD24		BRD7	EEF1A1	NLRP3					DEF8				CD36
82	CD27		SLC25A28	EEF1A2	ZBP1					DNASE2				CD63
83	CD28		SLC11A2	EIF2AK4	IL33					DNASE2B				CDC25C
84	CD38		TSC1	EIF4G1	FTL					ENTPD4				CDC42
85	CD3E		SNCA	EIF4G2	SQSTM1					FAM98A				CDCP1
86	CD44		SIRT3	ELAPOR1	VDAC2					FER				CDH1
87	CD5		TFRC	EP300	VDAC3					FES				CDH2
88	CD70		CGAS	EPM2A	CHMP7					FGR				CDH3
89	CD74		STING1	ERCC4	PGAM5					FLCN				CDK1
90	CDIP1		HDDC3	ERN1	BIRC2					FOXF1				CDK11A
91	CDKN1A		MDM2	EXOC1	BIRC3					FTH1				CDK11B
92	CDKN2D		MDM4	EXOC4	EIF2AK2					FTL				CDKN1A
93	CEBPB		DLD	EXOC7	PLA2G4					FUCA1				CDKN1B
94	CFLAR		DNAJB6	EXOC8	DNM1L					GAA				CDKN2A
95	CHAC1		WWTR1	FBXL2	SPATA2					GAB2				CDKN3
96	CHCHD10		PRKCA	FBXO7	FAF1					GALC				CEACAM1
97	CHEK2		SMPD1	FBXW7	SHARPIN					GALNS				CEACAM3
98	CIB1		MYCN	FEZ1	NOX2					GATA2				CEACAM4
99	CIDEB		SMG9	FEZ2	USP21					GBA				CEACAM5
100	CLU		TLR4	FLCN	PARP1					GCC2				CEACAM6
101	COA8		PAQR3	FOXK1	CHMP4C					GGA1				CEACAM8
102	COL2A1		MICU1	FOXK2						GGA2				CEBPB
103	CRADD		QSOX1	FOXO1						GGA3				CEMIP
104	CREB3		CLTRN	FOXO3						GLA				CFLAR
105	CREB3L1		KLF2	FTH1						GLB1				CHEK2
106	CRH		YTHDC2	FTL						GM2A				CLDN1
107	CRIP1		DDR2	FYCO1						GNPTAB				CLU
108	CSF2		SLC39A7	FZD5						GNPTG				COL13A1
109	CSNK2A1		TRIM46	GAPDH						GNS				COL4A2
110	CSNK2A2		ACSL1	GATA4						GUSB				CPEB2
111	CTH		KDM5A	GBA						HDAC6				CPT1A
112	CTNNA1		CYGB	GFAP						HEXA				CRABP2
113	CTSC		GSTZ1	GNAI3						HEXB				CRYAB
114	CTTN		ACO1	GOLGA2						HGS				CRYBA1
115	CUL1		GJA1	GPR137						HGSNAT				CSK
116	CUL2		SLC7A11	GPR137B						HMOX1				CSNK2A1
117	CUL3		CIRBP	GPSM1						HPS6				CSPG4
118	CUL4A		YAP1	GSK3A						HSPA8				CTBP1
119	CUL5		TRIM26	GSK3B						HYAL1				CTNNA1
120	CX3CL1		FADS2	HAX1						IDS				CTNNB1
121	CX3CR1		PIEZO1	HDAC6						IDUA				CTNND1
122	CXCL12		LIFR	HERC1						IGF2R				CTTN
123	CYLD		PTPN6	HGF						IL13				CXCL12
124	CYP1B1		ADAM23	HIF1A						IL13RA2				CXCL8
125	DAB2IP		CPEB1	HMGB1						IL4				CXCR4
126	DAP		KDM6B	HMOX1						IL4R				DAP3
127	DAP3		METTL14	HSP90AA1						KIF1B				DAPK1
128	DAPK1		MIB1	HSPA8						KIT				DAPK2
129	DAPK2		KDM5C	HSPB1						KXD1				DLG1
130	DAPK3		CCDC6	HSPB8						LAMP1				DOCK1
131	DAPL1		PTGS2	HTR2B						LAMP2				E2F1
132	DAXX		FTH1	HTRA2						LAMP3				EDA2R
133	DBH		GPX4	HTT						LAMTOR1				EDAR
134	DCC		AKR1C1	HUWE1						LAPTM4A				EDIL3
135	DDIAS		AKR1C2	IFI16						LAPTM4B				EEF1A1
136	DDIT3		AKR1C3	IFNG						LAPTM5				EEF2K
137	DDIT4		RB1	IKBKG						LAT				EGF
138	DDX3X		HSPB1	IL10						LAT2				EGFR
139	DDX47		HSF1	IL10RA						LGALS9				EHMT2
140	DDX5		NFE2L2	IL4						LGMN				EIF2AK3
141	DEDD		SQSTM1	IRGM						LIPA				ELANE
142	DEDD2		NQO1	ITPR1						LRRK2				ELK1
143	DELE1		MUC1	KAT5						LYN				ENDOG
144	DEPTOR		MT1G	KAT8						M6PR				EPHA2
145	DIABLO		SLC40A1	KDM4A						MAN2B1				EPHB6
146	DIDO1		CISD1	KDR						MANBA				ERBB2
147	DNAJA1		HSPA5	KEAP1						MAP1LC3A				ETV4
148	DNAJC10		HELLS	KIF25						MAP6				EZH2
149	DNM1L		SCD	KLHL22						MCOLN1				EZR
150	DPF2		SRC	KLHL3						MFSD8				F10
151	DYRK2		STAT3	LACRT						MILR1				F3
152	E2F1		PML	LAMP1						MRGPRX2				FADD
153	E2F2		NFS1	LAMP2						MT3				FAS
154	EDA2R		TP63	LAMP3						MYH9				FASLG
155	EIF2AK3		CDKN1A	LAMTOR1						NAGA				FASN
156	ELL3		FH	LAMTOR2						NAGLU				FBLIM1
157	ENO1		CISD2	LAMTOR3						NAGPA				FBXW7-AS1
158	EP300		CBS	LAMTOR4						NAPSA				FER
159	EPHA2		ISCU	LAMTOR5						NCOA4				FGF2
160	EPO		ACSL3	LARP1						NDEL1				FN1
161	ERBB3		OTUB1	LEP						NEDD4				FOXA1
162	ERCC6		CD44	LEPR						NEU1				FOXC2
163	ERN1		BRD4	LGALS8						NPC1				FOXO3
164	ERN2		PRDX6	LRRK2						NPC2				GDF2
165	ERO1A		SESN2	LRSAM1						NR4A3				GKN1
166	ERP29		NF2	LZTS1						PDPK1				GLI2
167	EYA1		ARNTL	MAP1LC3A						PIK3C3				GLO1
168	EYA2		HIF1A	MAP1LC3B						PIK3CD				GLUD1
169	EYA3		CA9	MAP1LC3C						PIK3CG				GNE
170	EYA4		TMBIM4	MAP3K7						PIP4K2A				GRHL2
171	FADD		AIFM2	MAPK15						PIP4K2B				GSK3B
172	FAF1		LAMP2	MAPK3						PIP4P1				HAVCR2
173	FAIM		ZFP36	MAPK8						PLA2G15				HGF
174	FAIM2		PROM2	MAPT						PLA2G3				HIF1A
175	FAM162A		CHMP5	MCL1						PLEKHM1				HK2
176	FAS		CHMP6	MEFV						PLEKHM2				HMCN1
177	FASLG		CAV1	MET						PPT1				HMGA1
178	FASTK		GCH1	MFN2						PPT2				HMOX1
179	FBH1		PIR	MFSD8						PSAP				HOTAIR
180	FBXW7		GCLC	MID2						PSAPL1				HRAS
181	FEM1B		HCAR1	MIR199A1						PTGDR				HSP90B1
182	FGA		SLC16A1	MIRLET7B						PTGDS				HSPB1
183	FGB		RRM2	MLST8						RAB34				HTRA1
184	FGF10		SREBF1	MT3						RAB3A				ID2
185	FGFR1		SREBF2	MTCL1						RAB7A				IFI27
186	FGFR3		FZD7	MTDH						RAC2				IGF1
187	FGG		BCAT2	MTM1						RUBCNL				IGF1R
188	FHIT		PLA2G6	MTMR3						S100A13				IKBKG
189	FIGNL1		PARK7	MTMR4						SCARB2				IL6
190	FIS1		FXN	MTMR8						SGSH				ILK
191	FNIP2		SUV39H1	MTMR9						SLC11A1				INHBB
192	FXN		ATF2	MTOR						SLC11A2				IQGAP1
193	FYN		STK11	NCOA4						SLC17A5				IRF6
194	FZD9		CDH1	NEDD4						SMPD1				ITGA2
195	G0S2		NEDD4L	NLRP6						SNAP23				ITGA3
196	GABARAP		FTMT	NOD1						SNAPIN				ITGA4
197	GATA1		DECR1	NOD2						SNX16				ITGA5
198	GATA4		GLRX5	NPC1						SNX4				ITGA6
199	GCLM		PANX2	NPRL2						SORL1				ITGA8
200	GDNF		TFAP2A	NRBP2						SORT1				ITGAV
201	GFRAL		CP	NUPR1						SPAG9				ITGB1
202	GGCT		ARF6	OPTN						SPHK2				ITGB3
203	GHITM		GDF15	ORMDL3						SQSTM1				ITGB4
204	GNAI2		ABHD12	OSBPL7						STXBP1				ITGB5
205	GNAI3		TFAM	PAFAH1B2						STXBP2				JUP
206	GPER1		KDM3B	PARK7						SUMF1				KDM3A
207	GPX1		RNF113A	PHB2						SYK				KDR
208	GRINA		IDH2	PHF23						SYTL4				KL
209	GSDME		PPARA	PIK3C2A						TCIRG1				KLF12
210	GSK3A		SIAH2	PIK3C3						TFEB				KRAS
211	GSK3B		NEDD4	PIK3CA						TMEM106B				KRT14
212	GSKIP		AR	PIK3CB						TPP1				LAMA3
213	GSTP1		MTF1	PIK3R2						UNC13D				LAMB3
214	GZMB		COPZ1	PIM2						VAMP7				LAMC2
215	HDAC1		NUPR1	PINK1						VAMP8				LATS1
216	HERPUD1		USP35	PIP4K2A						VPS33A				LDHA
217	HGF		PDSS2	PIP4K2B						VPS33B				LGALS1
218	HIC1		BEX1	PIP4K2C						VPS4A				LGALS3
219	HIF1A		FABP4	PJVK						WASH3P				LMO3
220	HINT1		TYRO3	PLEKHF1						ZFYVE16				LPAR1
221	HIP1		SIRT6	PLK2										LRP1
222	HIP1R		KIF20A	PLK3										LTB4R2
223	HIPK1		ECH1	POLDIP2										LTF
224	HIPK2		ETV4	PRKAA1										MAD2L1
225	HMGB2		VCP	PRKAA2										MALAT1
226	HMOX1		RBMS1	PRKAB1										MAOA
227	HNRNPK		KDM4A	PRKAB2										MAP2K1
228	HRAS		MGST1	PRKACA										MAP2K2
229	HRK		MPC1	PRKAG1										MAP3K1
230	HSPA1A		CAMKK2	PRKAG2										MAP3K7
231	HSPA1B		SOX2	PRKAG3										MAPK1
232	HSPB1		SRSF9	PRKD1										MAPK11
233	HTRA2		MEF2C	PRKN										MAPK3
234	HTT		EZH2	PSAP										MAPK8
235	HYAL2		PEDS1	PTPN22										MAVS
236	HYOU1		CDC25A	PYCARD										MCL1
237	ICAM1		LCN2	QSOX1										MDM2
238	IFI16		TRIB2	RAB39B										MET
239	IFI27		DHODH	RAB3GAP1										MGAT5
240	IFI27L1		PDK4	RAB3GAP2										MIR107
241	IFI27L2		PTPN18	RAB7A										MIR10A
242	IFI6		FTL	RAB8A										MIR124-1
243	IFNB1		ABCC5	RALB										MIR141
244	IFNG		CISD3	RASIP1										MIR181A1
245	IGF1		GALNT14	RB1CC1										MIR1827
246	IKBKE		KLHDC3	RETREG1										MIR200A
247	IL12A		GSTM1	RETREG3										MIR200B
248	IL19		RARRES2	RHEB										MIR200C
249	IL1A		USP11	RIPK2										MIR204
250	IL1B			RMC1										MIR21
251	IL2			RNF152										MIR26A1
252	IL20RA			RNF41										MIR30B
253	IL33			RNF5										MIR30C1
254	IL4			ROCK1										MIR363
255	IL6R			RPTOR										MIR525
256	IL7			RRAGA										MIR630
257	INCA1			RRAGB										MMP11
258	ING2			RRAGC										MMP13
259	ING5			RRAGD										MMP2
260	INHBA			RUBCN										MMP9
261	INHBB			RUFY4										MNX1
262	INS			SCFD1										MSLN
263	ITGA6			SCOC										MTA1
264	ITGAM			SEC22B										MTDH
265	ITGAV			SESN1										MTOR
266	ITM2C			SESN2										MUC1
267	ITPR1			SESN3										MYBBP1A
268	ITPRIP			SH3BP4										MYC
269	IVNS1ABP			SH3GLB1										MYH9
270	JAK2			SIRT1										MYO5A
271	JMY			SIRT2										NDRG1
272	JUN			SLC38A9										NFE2L2
273	KDM1A			SMCR8										NGF
274	KITLG			SMG1										NKX2-1
275	KRT18			SNCA										NOTCH1
276	KRT8			SNRNP70										NOTCH3
277	LCK			SNX32										NOX4
278	LGALS12			SNX5										NQO1
279	LGALS3			SNX6										NRAS
280	LRRK2			SOGA1										NTF3
281	LTBR			SOGA3										NTRK1
282	LY96			SPTLC1										NTRK2
283	MADD			SPTLC2										NTRK3
284	MAEL			SQSTM1										OCLN
285	MAGEA3			SREBF1										OGT
286	MAP2K5			SREBF2										OLFM3
287	MAP3K5			STAT3										PAK1
288	MAPK7			STBD1										PAK2
289	MAPK8			STING1										PAK3
290	MAPK8IP1			STK11										PAK4
291	MAPK8IP2			STUB1										PARP1
292	MAPK9			SUPT5H										PBK
293	MARCHF7			SVIP										PCNA
294	MAZ			SYNPO2										PDCD4
295	MCL1			TAB2										PDCD6IP
296	MDM2			TAB3										PDGFRB
297	MELK			TBC1D14										PDK4
298	MFF			TBC1D25										PDPK1
299	MIF			TBK1										PHLDA2
300	MIR132			TEX264										PIK3C2B
301	MIR15A			TFEB										PIK3CA
302	MIR16-1			TICAM1										PIK3CB
303	MIR17			TIGAR										PIK3CG
304	MIR198			TLK2										PIK3R1
305	MIR21			TMEM150A										PIK3R2
306	MIR210			TMEM150B										PIK3R3
307	MIR221			TMEM150C										PIN1
308	MIR222			TMEM39A										PIP5K1C
309	MIR26B			TMEM39B										PITPNC1
310	MIR27B			TMEM59										PLAT
311	MIR449A			TOMM7										PLAU
312	MKNK2			TP53										PLAUR
313	MLH1			TP53INP1										PLG
314	MLLT11			TP53INP2										PLK1
315	MMP9			TPCN1										PPARG
316	MNT			TPCN2										PPP1R13B
317	MOAP1			TREM2										PPP2CA
318	MPV17L			TRIB3										PPP2R1A
319	MSH2			TRIM13										PPP2R2D
320	MSH6			TRIM14										PPP2R5A
321	MSX1			TRIM21										PRKACA
322	MUC1			TRIM22										PRKCA
323	MUL1			TRIM27										PRKCI
324	MYBBP1A			TRIM34										PRKCQ
325	NACC2			TRIM38										PRKD1
326	NANOS3			TRIM5										PTEN
327	NBN			TRIM6										PTGS2
328	NCK1			TRIM65										PTHLH
329	NCK2			TRIM68										PTK2
330	NDUFA13			TRIM8										PTK2B
331	NDUFS3			TRIML1										PTK6
332	NFATC4			TRIML2										PTPN1
333	NFE2L2			TSC1										PTPN11
334	NGF			TSC2										PTRH2
335	NGFR			TSPO										PXN
336	NKX3-1			UBA5										PYCARD
337	NLE1			UBQLN1										QSOX1
338	NME5			UBQLN2										RAC1
339	NMT1			UBQLN4										RAC3
340	NOC2L			UCHL1										RACK1
341	NOG			UFC1										RAD9A
342	NOL3			UFL1										RAF1
343	NONO			UFM1										RANBP9
344	NOS3			ULK1										RB1
345	NOX1			USP10										RBFOX2
346	NR4A2			USP13										RBL2
347	NUPR1			USP30										RELA
348	OPA1			USP33										RHOA
349	P2RX4			USP36										RHOB
350	P2RX7			UVRAG										RHOC
351	P4HB			VDAC1										RHOG
352	PAK2			VPS13C										RHOQ
353	PAK5			VPS13D										RIPK1
354	PARK7			VPS26A										ROCK1
355	PARP1			VPS26B										RPS6KA3
356	PARP2			VPS35										RPS6KB1
357	PAWR			WAC										S100A4
358	PCGF2			WASHC1										S100A7
359	PDCD10			WDFY3										SATB1
360	PDCD5			WDR24										SCRIB
361	PDCD6			WDR41										SDCBP
362	PDIA3			WDR6										SERPINA1
363	PDK1			WDR81										SERPINB1
364	PDK2			WIPI2										SERPINE1
365	PDPK1			ZC3H12A										SESN1
366	PDX1			ZKSCAN3										SESN2
367	PEA15			ZMPSTE24										SESN3
368	PELI3													SETD2
369	PERP													SFN
370	PF4													SFRP1
371	PHIP													SH3GLB1
372	PHLDA3													SHC1
373	PIAS4													SIK1
374	PIDD1													SIK2
375	PIH1D1													SIRPA
376	PIK3R1													SIRT1
377	PINK1													SIRT3
378	PLAGL2													SIRT6
379	PLAUR													SKP2
380	PLEKHF1													SLC2A1
381	PLSCR3													SLC39A6
382	PMAIP1													SLCO1B3
383	PML													SMAD4
384	POLB													SMAD7
385	POU4F1													SMARCE1
386	POU4F2													SNAI2
387	PPARD													SOD2
388	PPIA													SP1
389	PPIF													SPHK1
390	PPM1F													SPIB
391	PPP1CA													SPINK1
392	PPP1R13B													SPP1
393	PPP1R15A													SRC
394	PPP2R1B													SRSF3
395	PPP3CC													STAT3
396	PPP3R1													STK11
397	PRDX2													STK38
398	PRELID1													TDGF1
399	PRKCA													TFDP1
400	PRKCD													TGFB1
401	PRKDC													THBS1
402	PRKN													TIAM1
403	PRKRA													TIMP1
404	PRODH													TLE1
405	PSEN1													TLE5
406	PSMD10													TLR3
407	PSME3													TNC
408	PTEN													TNFRSF10B
409	PTGIS													TNFRSF12A
410	PTH													TNFRSF1A
411	PTPMT1													TNFSF10
412	PTPN1													TP53
413	PTPN2													TP63
414	PTPRC													TP73
415	PTTG1IP													TPM1
416	PYCARD													TRAF2
417	QARS1													TRIM31
418	RACK1													TSC2
419	RAF1													TSG101
420	RB1													TUBB3
421	RB1CC1													TWIST1
422	RBCK1													UBE2C
423	RELA													VEGFA
424	RET													VPS37A
425	RFFL													VTN
426	RHOT1													XAF1
427	RHOT2													XIAP
428	RIPK1													YAP1
429	RIPK3													YWHAZ
430	RNF183													ZBTB7A
431	RNF186													ZEB1
432	RNF34													ZEB2
433	RNF41													ZNF304
434	RPL11													ZNF32
435	RPL26
436	RPS27L
437	RPS3
438	RPS6KB1
439	RPS7
440	RRP8
441	RTKN2
442	RTL10
443	S100A8
444	S100A9
445	SCG2
446	SCN2A
447	SCRT2
448	SELENOK
449	SELENOS
450	SENP1
451	SEPTIN4
452	SERINC3
453	SERPINE1
454	SFN
455	SFPQ
456	SFRP1
457	SFRP2
458	SGMS1
459	SGPL1
460	SGPP1
461	SH3RF1
462	SHH
463	SHISA5
464	SIAH1
465	SIAH2
466	SIRT1
467	SIVA1
468	SKIL
469	SLC25A5
470	SLC35F6
471	SLC9A3R1
472	SMAD3
473	SNAI1
474	SNAI2
475	SNW1
476	SOD1
477	SOD2
478	SORT1
479	SP100
480	SRC
481	SRPX
482	SST
483	SSTR3
484	ST20
485	STK11
486	STK24
487	STK25
488	STK3
489	STK4
490	STRADB
491	STX4
492	STYXL1
493	SYVN1
494	TAF9
495	TAF9B
496	TCF7L2
497	TERT
498	TFDP1
499	TFDP2
500	TFPT
501	TGFB1
502	TGFB2
503	TGFBR1
504	THBS1
505	TICAM1
506	TICAM2
507	TIMM50
508	TIMP3
509	TLR3
510	TLR4
511	TM2D1
512	TMBIM1
513	TMBIM6
514	TMC8
515	TMEM102
516	TMEM109
517	TMEM117
518	TMEM14A
519	TMEM161A
520	TNF
521	TNFAIP3
522	TNFRSF10A
523	TNFRSF10B
524	TNFRSF10C
525	TNFRSF12A
526	TNFRSF1A
527	TNFRSF1B
528	TNFRSF25
529	TNFSF10
530	TNFSF12
531	TOPORS
532	TP53
533	TP53BP2
534	TP63
535	TP73
536	TPD52L1
537	TPT1
538	TRADD
539	TRAF1
540	TRAF2
541	TRAF7
542	TRAP1
543	TRIAP1
544	TRIB3
545	TRIM32
546	TRIM39
547	TXNDC12
548	TYROBP
549	UACA
550	UBB
551	UBE2K
552	UBE4B
553	UBQLN1
554	UMOD
555	UNC5B
556	URI1
557	USP28
558	USP47
559	VDAC2
560	VNN1
561	WDR35
562	WNT4
563	WWOX
564	XBP1
565	YAP1
566	YBX3
567	YWHAB
568	YWHAE
569	YWHAG
570	YWHAH
571	YWHAQ
572	YWHAZ
573	ZC3HC1
574	ZDHHC3
575	ZMYND11
576	ZNF205
577	ZNF385A
578	ZNF385B
579	ZNF622
580	ZSWIM2
